# Supplementary material for: Transient Changes in Bacterioplankton Communities Induced by the Submarine Volcanic Eruption of El Hierro (Canary Islands)
Source: PLOS journal article supplement (doi:10.1371/journal.pone.0118136), 2015-02-11
Supplement: S2 (10.1371/journal.pone.0118136.s002) [file journal.pone.0118136.s002]

**Table S2.** Average relative abundance (percentage) of different taxa in each of the three types of samples clustered together in the nMDS plot (see Figure 5): eruption, post-eruption and deep samples.

| TAXA                                            | ERUPTION | POST-ERUPTION | DEEP |
|-------------------------------------------------|----------|---------------|------|
| Actinobacteria                                  | 1.1      | 2.3           | 2.8  |
| Bacteroidetes                                   | 3.9      | 7.1           | 1.8  |
| Candidate division ZB3                          | 0.2      | 0.0           | 0.0  |
| Chloroflexi (SAR202 group)                      | 0.2      | 0.2           | 2.7  |
| Cyanobacteria                                   | 35.7     | 13.2          | 0.3  |
| Gemmatimonadetes                                | 0.0      | 0.0           | 0.4  |
| Planctomycetes                                  | 0.2      | 0.1           | 0.5  |
| Proteobacteria: Alphaproteobacteria-SAR11 group | 39.2     | 56.0          | 48.2 |
| Proteobacteria: Alphaproteobacteria-Other       | 2.8      | 2.7           | 3.2  |
| Proteobacteria: Betaproteobacteria              | 0.2      | 0.1           | 0.0  |
| Proteobacteria: Deltaproteobacteria             | 0.7      | 0.5           | 17.4 |
| Proteobacteria: Epsilonproteobacteria           | 1.5      | 0.0           | 0.2  |
| Proteobacteria: Gammaproteobacteria             | 11.0     | 10.2          | 7.6  |
| SAR406                                          | 1.4      | 1.6           | 6.5  |
| Verrucomicrobia                                 | 0.8      | 0.3           | 0.5  |
| Bacteria: Other*                                | 1.1      | 5.7           | 7.9  |

\*Includes: Zetaproteobacteria, Spirochaetes, Firmicutes, Acidobacteria, Nitrospirae, Lentisphaerae and other unclassified Bacteria
