# Supplementary material for: Transient Changes in Bacterioplankton Communities Induced by the Submarine Volcanic Eruption of El Hierro (Canary Islands)
Source: PLOS journal article supplement (doi:10.1371/journal.pone.0118136), 2015-02-11

**Figure S1.** Temperature and oxygen profiles from Station 3R (Volcano) and Station 1R (Control) throughout the Bimbache cruises (BBC3, 4-9 Nov 2011; BBC5, 16-20 Nov 2011; BBC8, 13-15 Jan 2012; BBC10, 9-12 Feb 2012; BBC12, 24-26 Feb 2012).

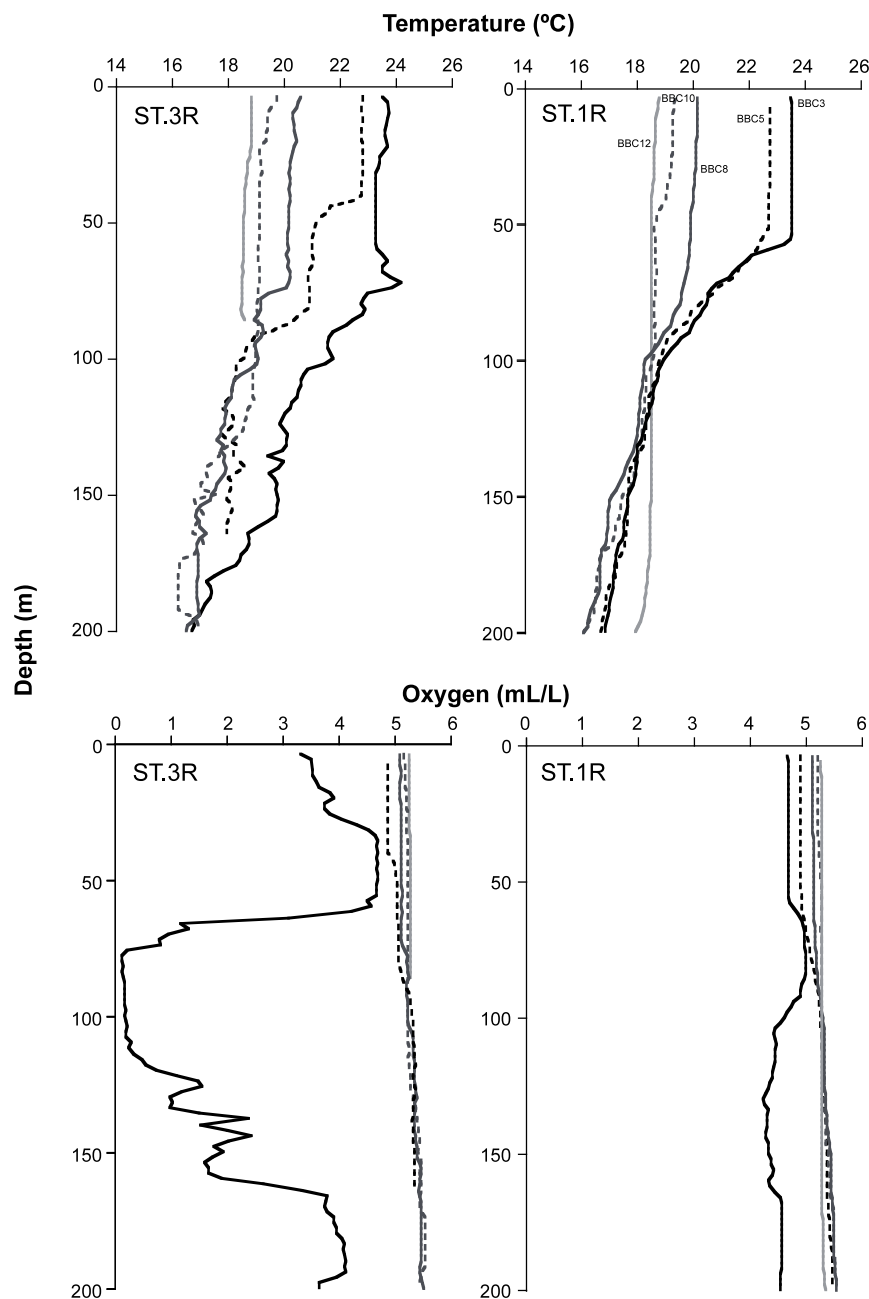

Supplement: S3 (10.1371/journal.pone.0118136.s003) [file journal.pone.0118136.s003]
