# Supplementary material for: Transient Changes in Bacterioplankton Communities Induced by the Submarine Volcanic Eruption of El Hierro (Canary Islands)
Source: PLOS journal article supplement (doi:10.1371/journal.pone.0118136), 2015-02-11

**Figure S2.** Archaea richness estimates (Chao1) by groups of samples: epipelagic samples from eruption (eruption), epipelagic samples from post-eruption (post-eruption) and mesopelagic samples (deep).

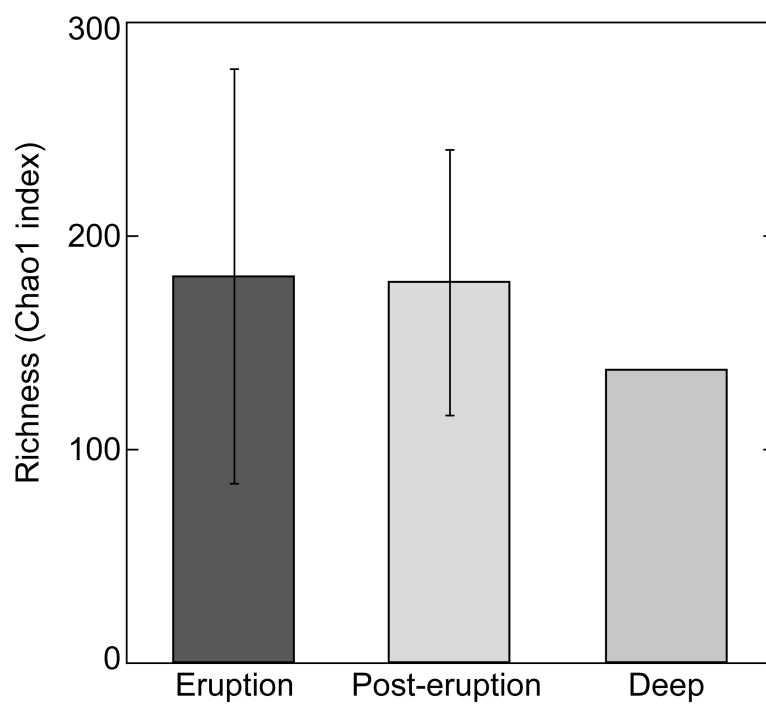

Supplement: S4 (10.1371/journal.pone.0118136.s004) [file journal.pone.0118136.s004]
