# Supplementary material for: Transient Changes in Bacterioplankton Communities Induced by the Submarine Volcanic Eruption of El Hierro (Canary Islands)
Source: PLOS journal article supplement (doi:10.1371/journal.pone.0118136), 2015-02-11

**Figure S3.** Rarefaction analyses of the bacterial 16R rRNA gene sequences clustered at 97% similarity. Operational taxonomic units represented by one tag only (singletons) were discarded from the dataset to avoid potential artifacts in diversity estimates. BBC: Bimbache and GYT: Guayota cruises. St. Station. See Figure 1 and Supplementary Table SM1 for sample information.

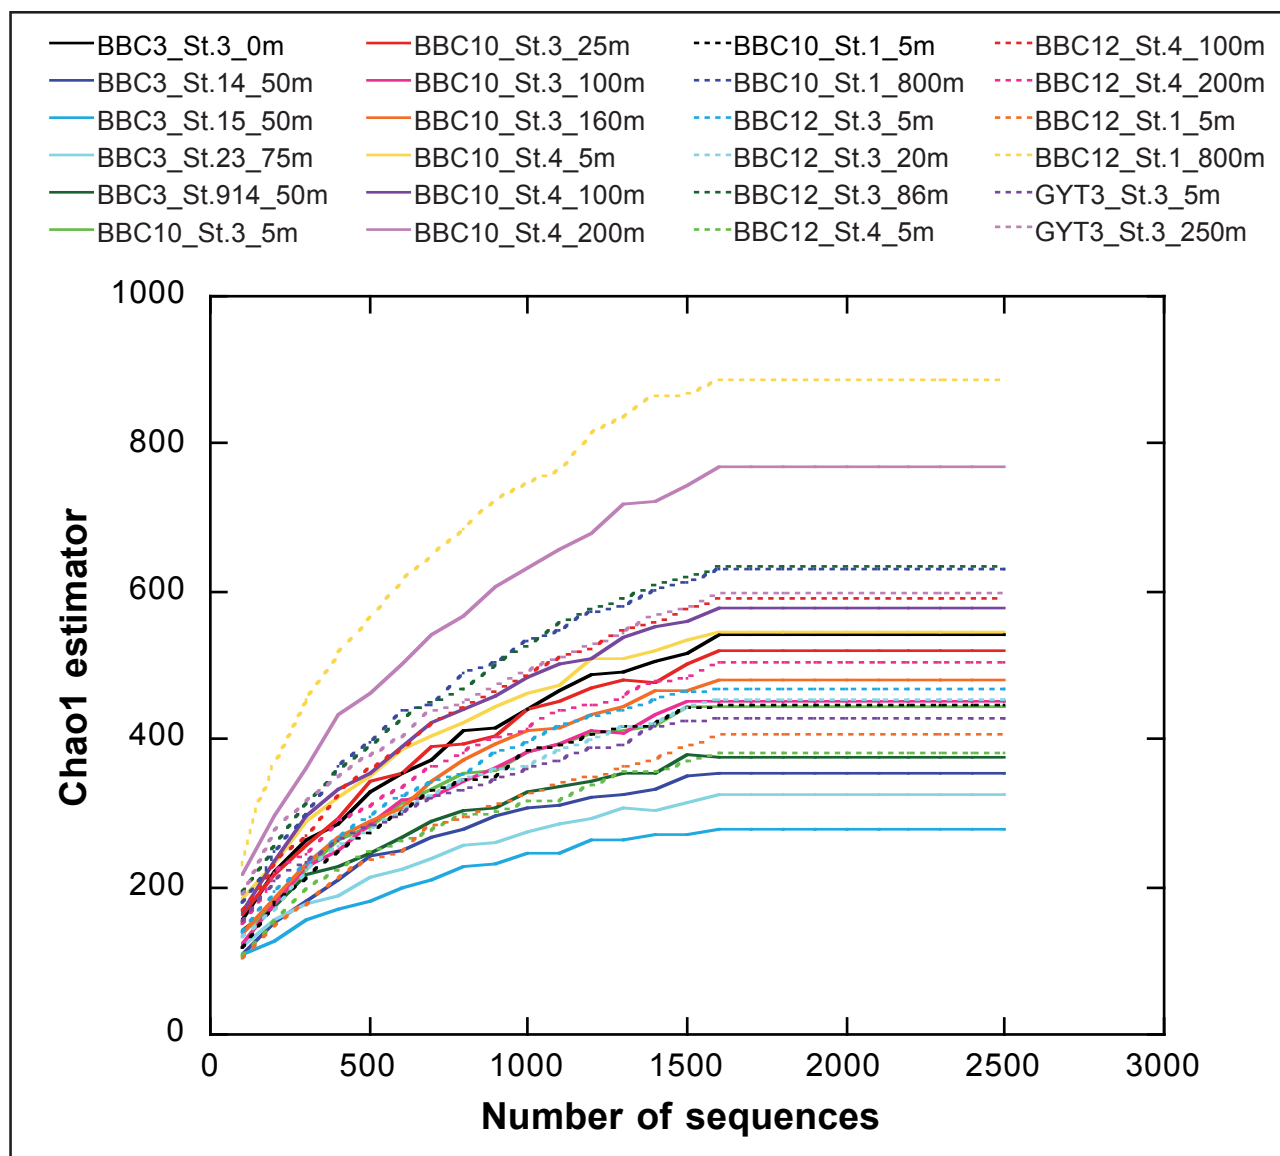

Supplement: S5 (10.1371/journal.pone.0118136.s005) [file journal.pone.0118136.s005]
